# Supplementary material for: IgA-Targeted Lactobacillus jensenii Modulated Gut Barrier and Microbiota in High-Fat Diet-Fed Mice
Source: PubMed Central journal article supplement (PMC6542990; doi:10.3389/fmicb.2019.01179), 2019-05-24
Supplement: Data_Sheet_1.pdf [file Data_Sheet_1.pdf]

## Supplementary Material

### 1. Supplementary Table

**Supplementary Table S1.** Basic physical characteristics and blood lipids profile of volunteers

|                                       | Population   | Standard range |
|---------------------------------------|--------------|----------------|
| Age (years)                           | 23.45(3.24)  | -              |
| Body mass index (kg m <sup>-2</sup> ) | 23.03(2.55)  | 18~24.9        |
| Waist hip ratio                       | 0.74(0.05)   | 0.67~0.80      |
| Waist circumference (cm)              | 71.58(12.33) | >80            |
| Hip circumference (cm)                | 96.72(15.47) | >90            |
| HDL-Cholesterol (mg/dl)               | 66.08(16.35) | 33~77          |
| LDL-Cholesterol (mg/dl)               | 87.49(28.58) | 80~120         |
| Triglycerides (mg/dl)                 | 82.74(42.96) | >150           |

Values are given as means and standard deviations (SD)

**Supplementary Table S2.** PCR primers used in AFLP and mRNA expression analysis

| Name                    | Sequence                                                 | Annealing temperature (°C) |
|-------------------------|----------------------------------------------------------|----------------------------|
| Bacteria identification |                                                          |                            |
| 27F                     | AGAGTTTGATCMTGGCTCAG                                     | 56                         |
| 2792R                   | TACGGYTACCTTGTTACGACTT                                   |                            |
| AFLP analysis           |                                                          |                            |
| <i>EcoR</i> I adapter   | F:CTCGTAGACTGCGTACC<br>R:AATTGGTACGCAGTC                 | 65                         |
| <i>Mse</i> I adapter    | F:TACTCAGGACTCAT<br>R:GAGTCCTGAGTAGCAG                   | 65                         |
| EcoRI core              | F:GACTGCGTACCAATTC                                       | 56                         |
| MseI core               | R:GATGAGTCCTGAGTAA                                       |                            |
| EcoRI-A                 | F:GACTGCATACCACCAATTCA                                   | 55                         |
| MseI-CA                 | R: AATGAGTCCTGAGTAGCA                                    |                            |
| mRNA expression         |                                                          |                            |
| $\beta$ -action         | F: TGACGTTGACATCCGTAAAGACC<br>R: CTCAGGAGGAGCAATGATCTTGA | 60                         |
| ZO-1                    | F: TACCTCTTGAGCCTTGA ACTT<br>R: CGTGCTGATGTGCCATAATA     | 60                         |
| Occludin                | F: GTGTGGTTGATCCCCAGGAG<br>R: TCGCTTGCCATTCAC TTTGC      | 60                         |
| Claudin-2               | F: CCCAGGCCATGATGGTGA<br>R: TCATGCCACCACAGAGATAAT        | 60                         |
| pIgR                    | F: AGTAACCGAGGCCTGTCCTT<br>R: GTCACTCGGCAACTCAGGA        | 60                         |
| Mucin-2                 | F: CCCAGAAGGGACTGTGTATG<br>R: TGCAGACACACTGCTCACA        | 59                         |

AFLP: Amplified fragment length polymorphism; pIgR, The polymeric immunoglobulin receptor;  
ZO-1, Zonula occludens-1

**Supplementary Table S3.** Animal feed formulation

| Ingredient                  | Proportion (%) |               |
|-----------------------------|----------------|---------------|
|                             | Normal control | High fat diet |
| Corn flour                  | 48.38          | 30.3          |
| Wheat flour                 | 9              | 9             |
| Wheat bran                  | 9              | 9             |
| Soybean meal                | 24.52          | 24.52         |
| Soybean oil                 | 2.8            | 2.8           |
| Lard                        | 2.54           | 20.62         |
| Sucrose                     | 0.1            | 0.1           |
| Lysine                      | 0.28           | 0.28          |
| Methionine                  | 0.2            | 0.2           |
| CaHPO <sub>3</sub>          | 1.2            | 1.2           |
| CaCO <sub>3</sub>           | 1.6            | 1.6           |
| NaCl                        | 0.2            | 0.2           |
| Choline chloride            | 0.1            | 0.1           |
| Mixed vitamin <sup>a</sup>  | 0.02           | 0.02          |
| Mixed minerals <sup>b</sup> | 0.06           | 0.06          |

<sup>a</sup>Mixed vitamin (per 1 Kg): Vitamin A  $1 \times 10^6$  IU, Vitamin D<sub>3</sub>  $5 \times 10^4$  IU, Vitamin E  $5 \times 10^2$  IU, Vitamin K<sub>3</sub> 100 mg, Vitamin B<sub>1</sub> 100 mg, Vitamin B<sub>2</sub> 100 mg, Vitamin B<sub>6</sub> 200 mg, Vitamin B<sub>12</sub> 5 mg, niacin 100 mg, thbrthdrexvbdr 200 mg, Add sucrose to 1 Kg; <sup>b</sup>Mixed minerals (per 1 Kg): FeSO<sub>4</sub>•H<sub>2</sub>O 255 g, GuSO<sub>4</sub>•H<sub>2</sub>O 27.9 g, MnSO<sub>4</sub>•H<sub>2</sub>O 253.8 g, ZnSO<sub>4</sub>•H<sub>2</sub>O 137 g, Na<sub>2</sub>SeO<sub>3</sub> 0.5 g, KI 0.7 g, Add sucrose to 1 Kg.

**Supplementary Table S4** Identification of strains

| AFLP pattern | Number | Reference strain                           | Similarity (%) |
|--------------|--------|--------------------------------------------|----------------|
| A1           | 3      | <i>Lactobacillus jensenii</i> DSM 20557    | 96.5           |
| A2           | 16     | <i>Lactobacillus jensenii</i> FN1621       | 99             |
| A3           | 4      | <i>Lactobacillus jensenii</i> DSM 20557    | 100            |
| A4           | 5      | <i>Lactobacillus jensenii</i> DSM 20557    | 99             |
| B1           | 5      | <i>Lactobacillus jensenii</i> FN1621       | 99             |
| B2           | 6      | <i>Lactobacillus jensenii</i> FN1621       | 99             |
| C1           | 1      | <i>Lactobacillus jensenii</i> FN1621       | 99             |
| I            | 8      | <i>Pediococcus acidilactici</i> NGRI 0510Q | 99             |
| II           | 7      | <i>Pediococcus acidilactici</i> NGRI 0510Q | 99.9           |
| III          | 1      | <i>Pediococcus acidilactici</i> FN1701     | 99.8           |

AFLP: Amplified fragment length polymorphism

## 2. Supplementary Figures

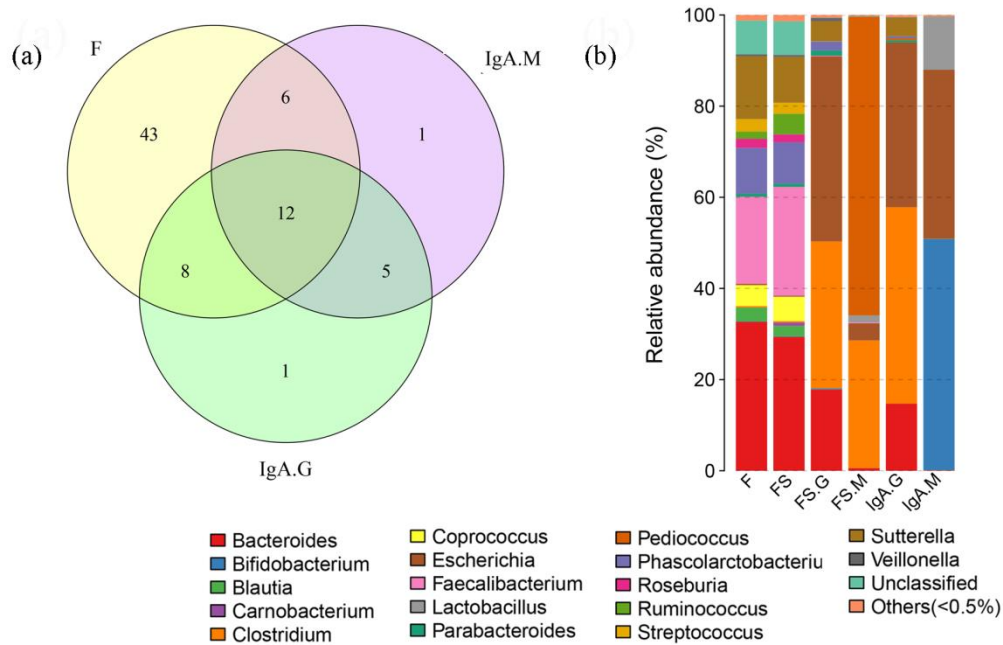

**Supplementary Figure S1.** Community structure of gut microbiota medium (GMM) and De Man Rogosa Sharpe (MRS) cultured IgA coated bacteria from a healthy female donor. (a) Venn diagrams comparing the OTU memberships of feces microbiota (F), GMM (IgA.G) and MRS (IgA.M) cultured IgA coated microbiota. (b) Genus composition of feces microbiota (F), IgA free microbiota (FS), and GMM and MRS cultured IgA coated microbiota and IgA free microbiota (FS.G and FS.M).

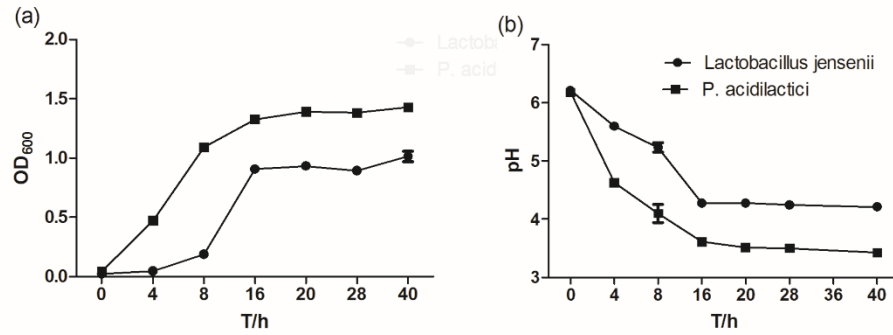

**Supplementary Figure S2.** Mean growth curve (a) and pH change (b) during fermentation of *Lactobacillus jensenii* IgA21 (n=6) and *P. acidilactici* FS1 (n=6).

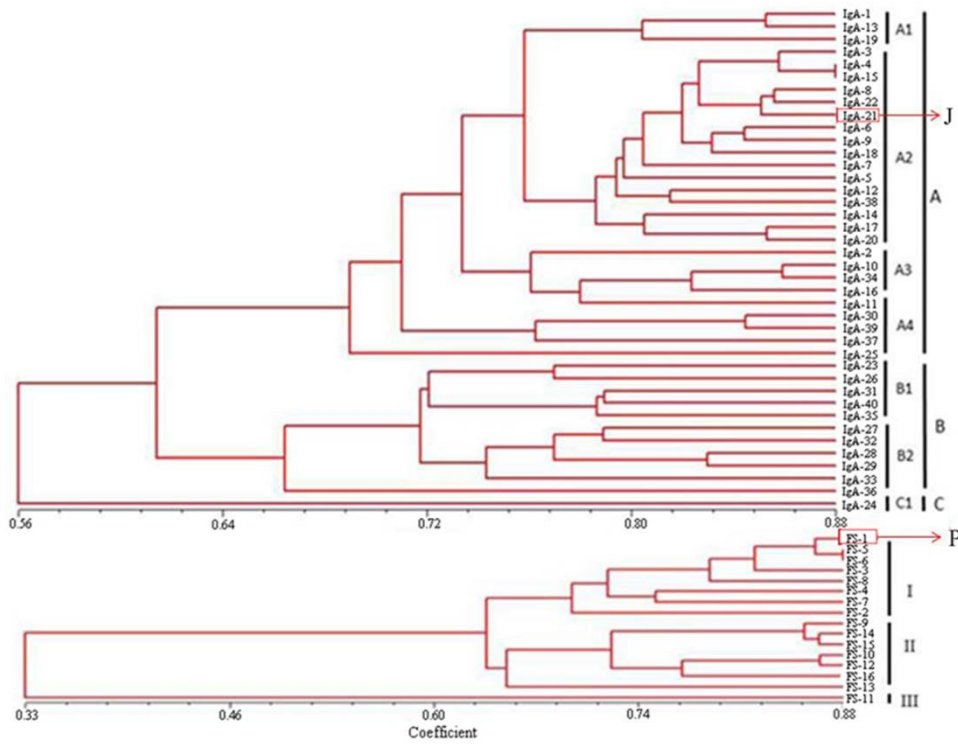

**Supplementary Figure S3.** Dendrogram generated using the unweighted pairgroup method with arithmetic averages (UPGMA) cluster analysis, with Dice's coefficient based on the amplified fragment length polymorphism (AFLP) profiling of the *Lactobacillus jensenii* and *Pediococcus acidilactici* strains isolated from IgA positive and free microbiota of human feces.

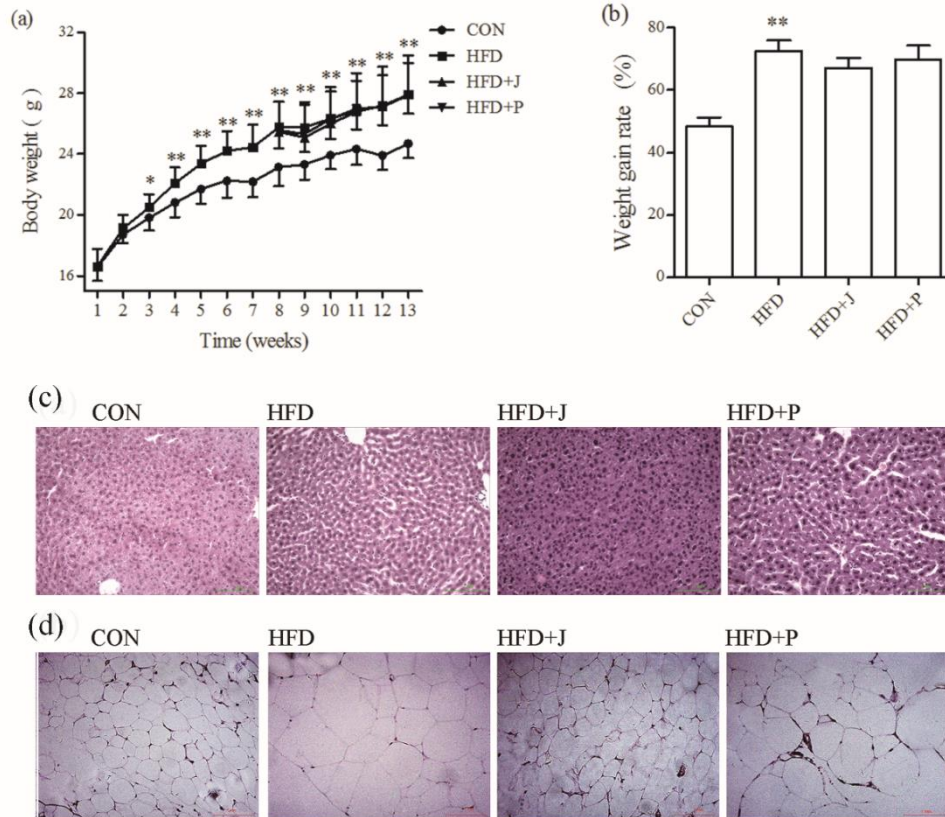

**Supplementary Figure S4.** Body weight change (a), weight gain rate (b), and hematoxylin and eosin (H&E) stains of liver (c) and white fat tissue (d). \*\*  $P < 0.01$  compared with CON. CON, control group; HFD, high fat diet group; HFD+J, HFD mice treated with *Lactobacillus jensenii* IgA21; HFD+P, HFD mice treated with *Pediococcus acidilactici* FS1
